# Supplementary material for: Iridium(NHC)-Catalyzed Sustainable Transfer Hydrogenation of CO2 and Inorganic Carbonates
Source: MDPI journal article supplement (doi:10.3390/catal11060695), 2021-05-31
Supplement: s1 [file s1]

Archive with 1 entries (1 files):
- catalysts-1236478-supplementary.pdf
